# Supplementary material for: Ultrathin CdS@BDC nanosheets derived from 2D metal–organic frameworks for enhanced photoinduced-stability and photocatalytic hydrogen production
Source: Royal Society of Chemistry journal article supplement (doi:10.1039/d2ma00866a), 2022-01-01
Supplement: d2ma00866a1.pdf [file d2ma00866a1.pdf]

Supporting Information

# Ultrathin CdS@BDC Nanosheets Derived from 2D Metal-Organic Frameworks for Enhanced Photoinduced-Stability and Photocatalytic Hydrogen Production

Jian Li <sup>a,b,1</sup>, Huaqiang Wang <sup>b,1</sup>, Yihong Gao <sup>b</sup>, Hao Fang <sup>b</sup>, Peiyu Chen <sup>b</sup>, Fangzhi Huang <sup>b,\*</sup>

<sup>a</sup> Department of Chemical and Chemical Engineering, Hefei Normal University, Hefei, 230601, PR China

<sup>b</sup> Lab of Clean Energy & Environmental Catalysis, Anhui Province Key Laboratory of Chemistry for Inorganic/Organic Hybrid Functionalized Materials, Institute of Physical Science and Information Technology, School of Chemistry and Chemical Engineering, Anhui University, Hefei 230601, P. R. China.

<sup>1</sup> These authors contribute equally to this paper

\* E-mail: huangfangzhi@163.com; Tel: +86-551-63861328

Received (in XXX, XXX) Xth XXXXXXXXXX 20XX, Accepted Xth XXXXXXXXXX 20XX

DOI: 10.1039/b000000x

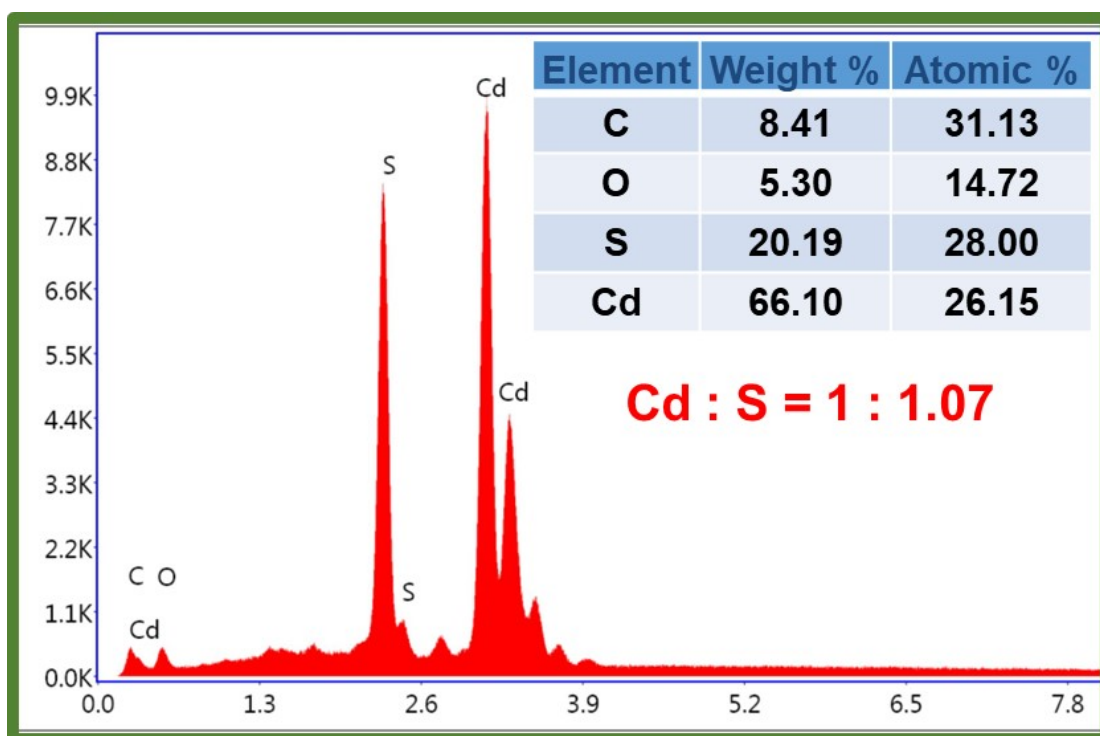

**Figure S1.** EDS spectra of CdS@BDC NSs.

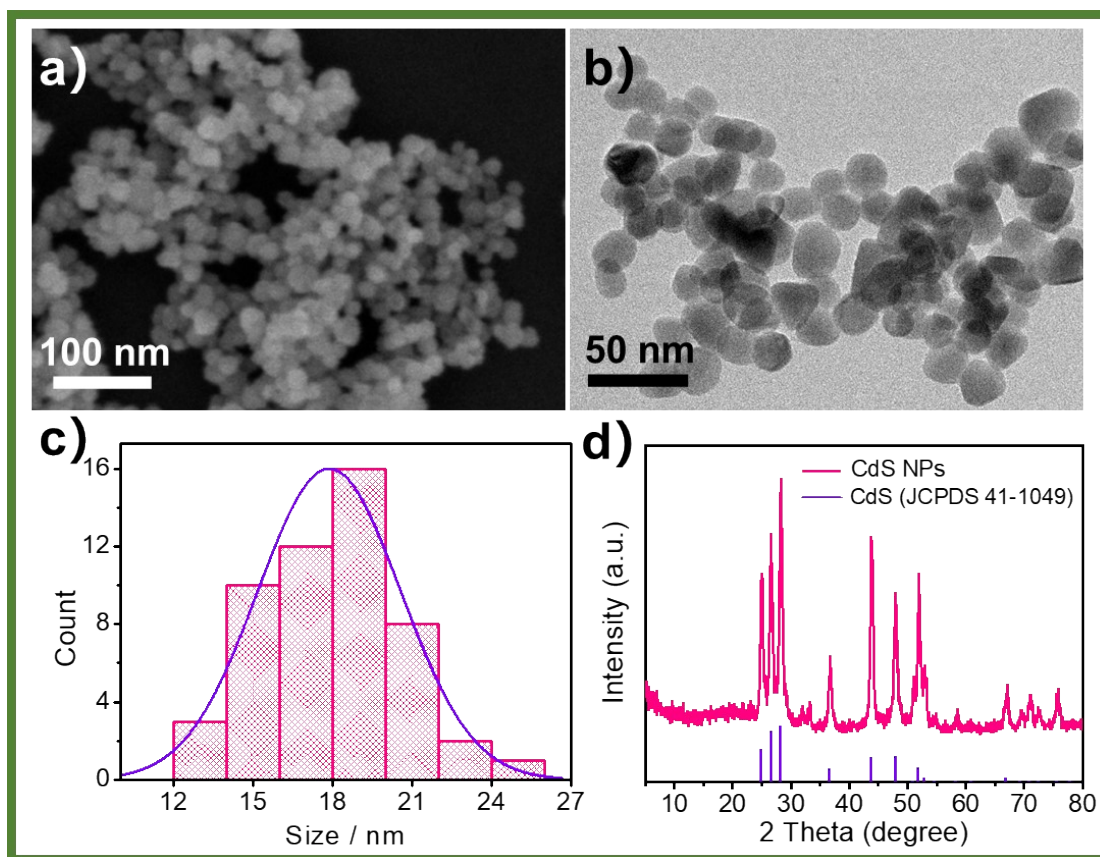

**Figure S2.** a) SEM image of CdS NPs, b) TEM image and corresponding particle size distribution (c) of CdS NPs, The sampling number is 50, and the center particle size is  $\approx 18$  nm, d) PXRD patterns for the CdS NPs. CdS NPs were synthesized for comparison. According to the SEM, TEM and corresponding particle size distribution (Fig. S2a-c), the resulting CdS NPs exhibited a good dispersion with a large particle size (12~27 nm). Moreover, as displayed in Fig. S2d, the diffraction peaks of the CdS NPs could be indexed to the hexagonal CdS phase (JCPDS no. 41-1049) with corresponding to the (100), (002), (101), (102), (110), (103), and (112) reflecting at  $24.9^\circ$ ,  $26.5^\circ$ ,  $28.2^\circ$ ,  $37.6^\circ$ ,  $44.00^\circ$ ,  $47.5^\circ$  and  $52.5^\circ$ , respectively.

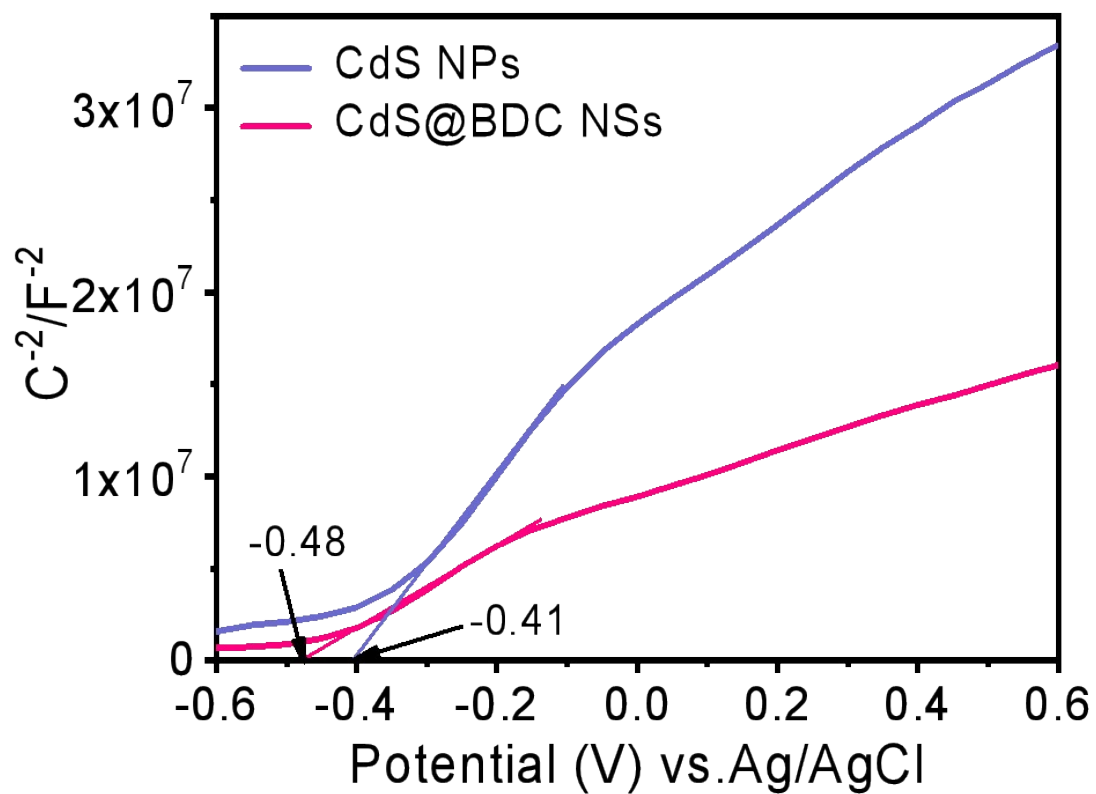

**Figure S3.** Mott-Schottky plots of the CdS NPs and CdS@BDC NSs.

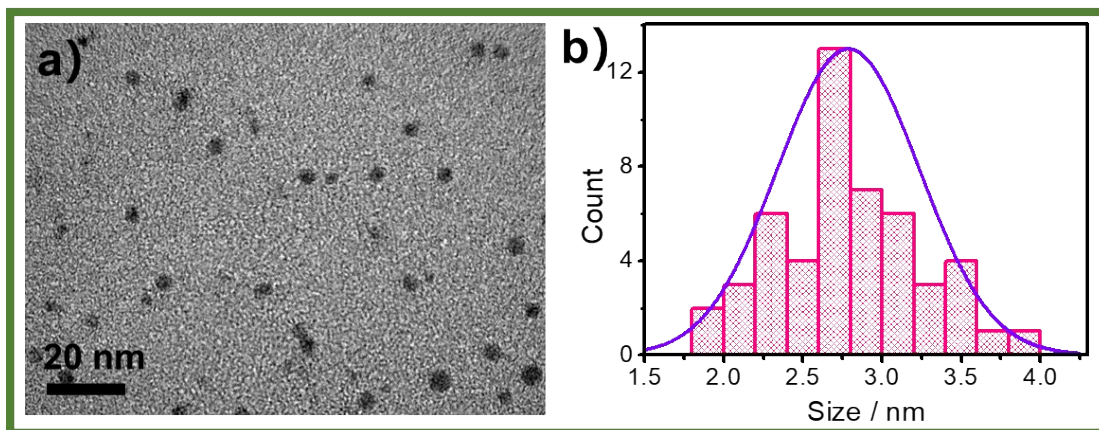

**Figure S4.** a) TEM image and corresponding particle size distribution (b) of CdS QDs.

The sampling number is 20, and the center particle size is  $\approx 2.75$  nm.

Synthesis of CdS Quantum Dots (QDs): CdS QDs were prepared by a reported aqueous phase approach.<sup>1</sup> In detail, 1 M NaOH solution was slowly dripped into 20.0 mL of 75 mM  $\text{Cd}(\text{NO}_3)_2 \cdot 2\text{H}_2\text{O}$  solution until the pH value of the mixed solution is 10.5, and then 1.5 mM thioglycolic acid (TGA) was added to the above solution as a stabilizer. After adding 20 mL of 75 mM  $\text{Na}_2\text{S}$  solution, the mixture was stirred for 30 minutes at 65 °C and aged for 90 minutes. Subsequently, the sample was obtained by centrifugation and rinsed several times using distilled water, and redispersed in deionized water forming CdS QDs solution.

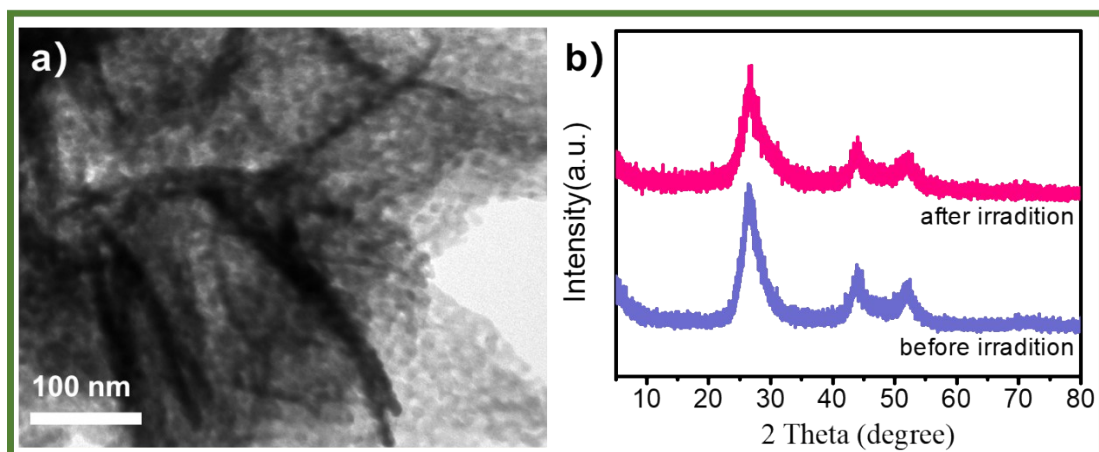

**Figure S5.** a) SEM image and (b) PXRD patterns of CdS@BDC NSs after four cycle photocatalytic H<sub>2</sub> production reactions.

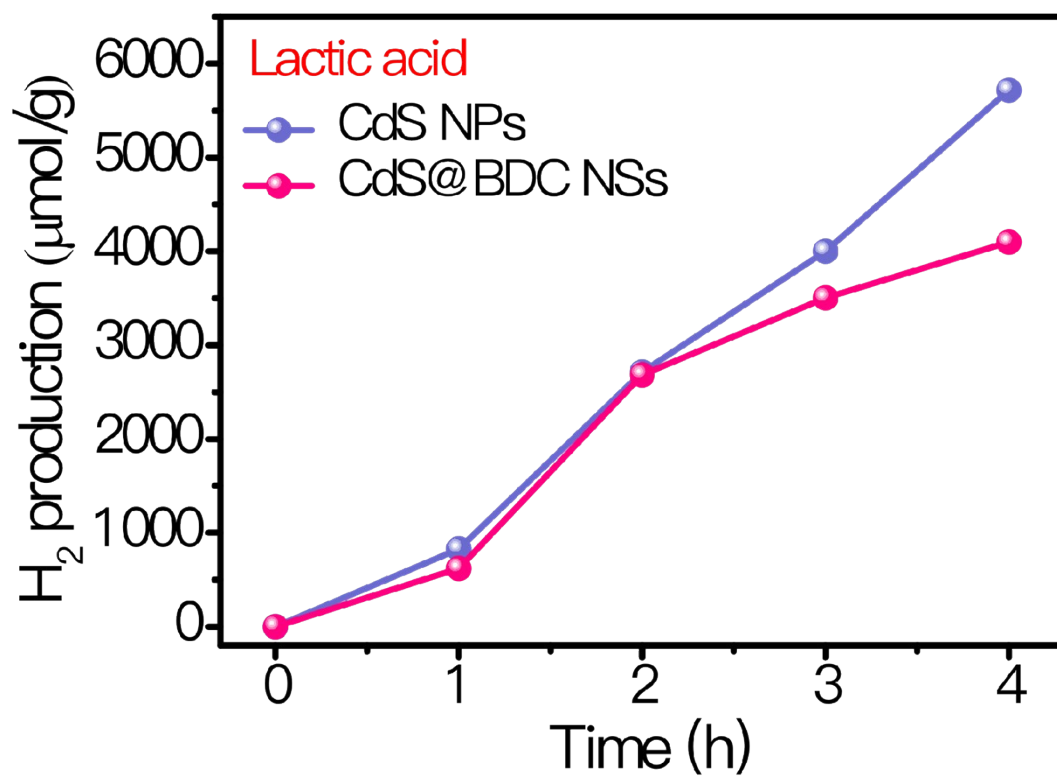

**Figure S6.** Photocatalytic H<sub>2</sub>-evolution activity for CdS NCs and CdS@BDC NSs in 20.0 mL Na<sub>2</sub>S/Na<sub>2</sub>SO<sub>3</sub> solution under visible-light irradiation ( $\lambda > 380$  nm).

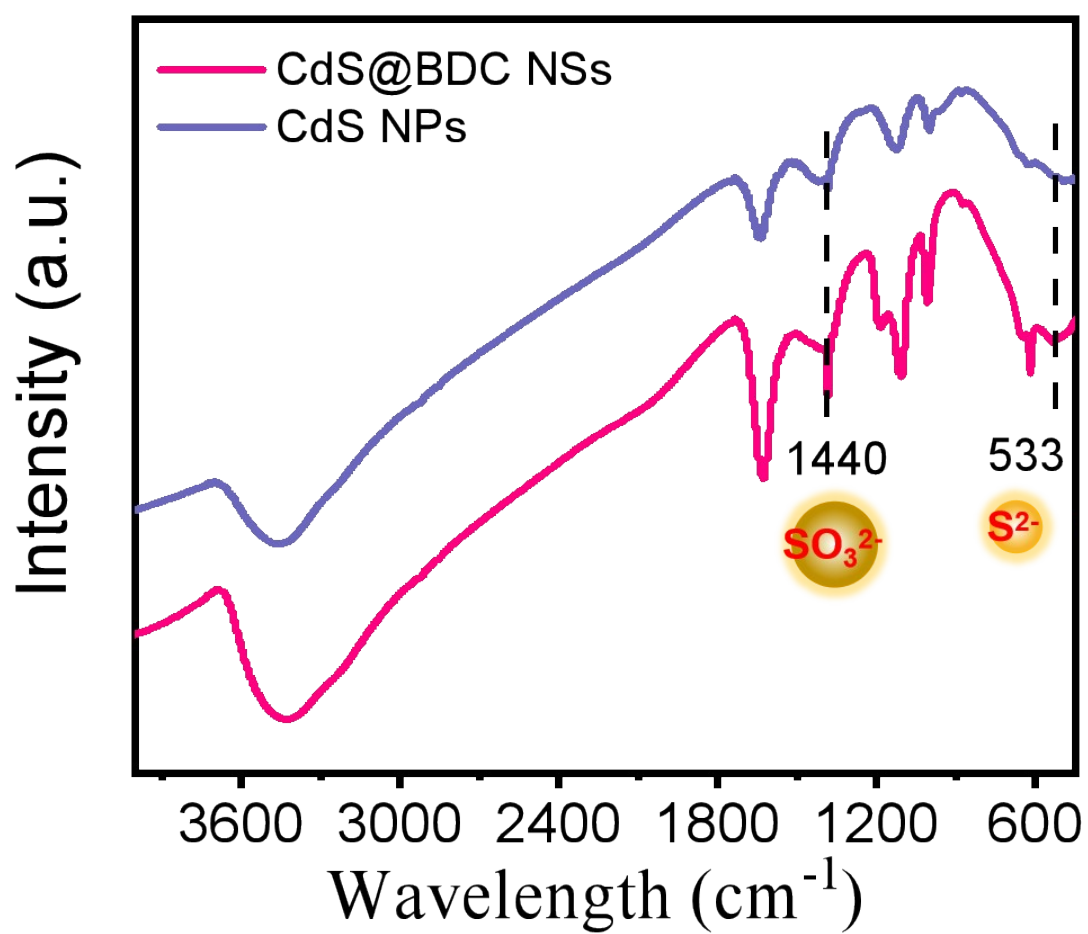

**Figure S7.** FTIR spectra of the CdS@BDC NSs and CdS NPs during the hydrogen production process.



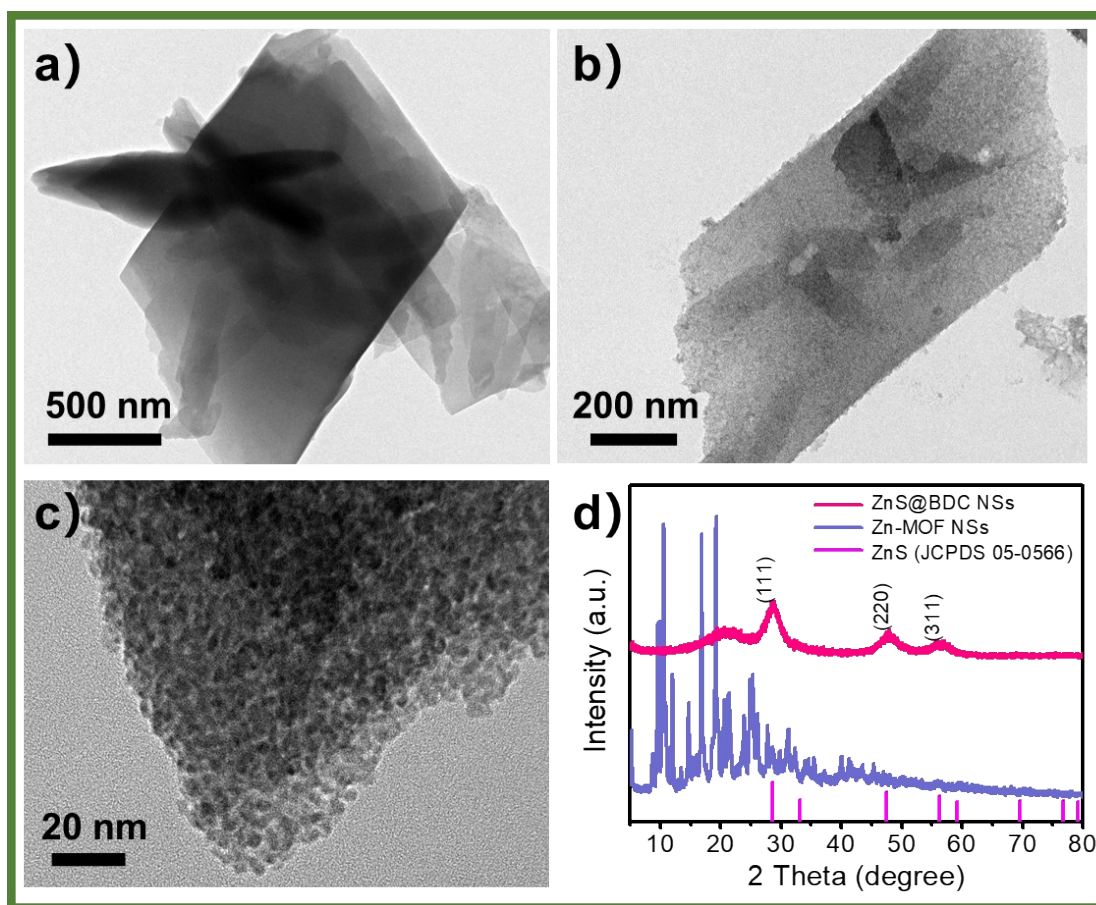

**Figure S8.** a) TEM image of Zn-MOF NSs, b-c) TEM images of Zn@BDC NSs, d) Powder XRD Profiles for Zn-MOF NSs and ZnS@BDC NSs.

The present synthesis method of Cd@BDC NSs was also applied to prepare ZnS@BDC NSs photocatalyst under an identical condition.

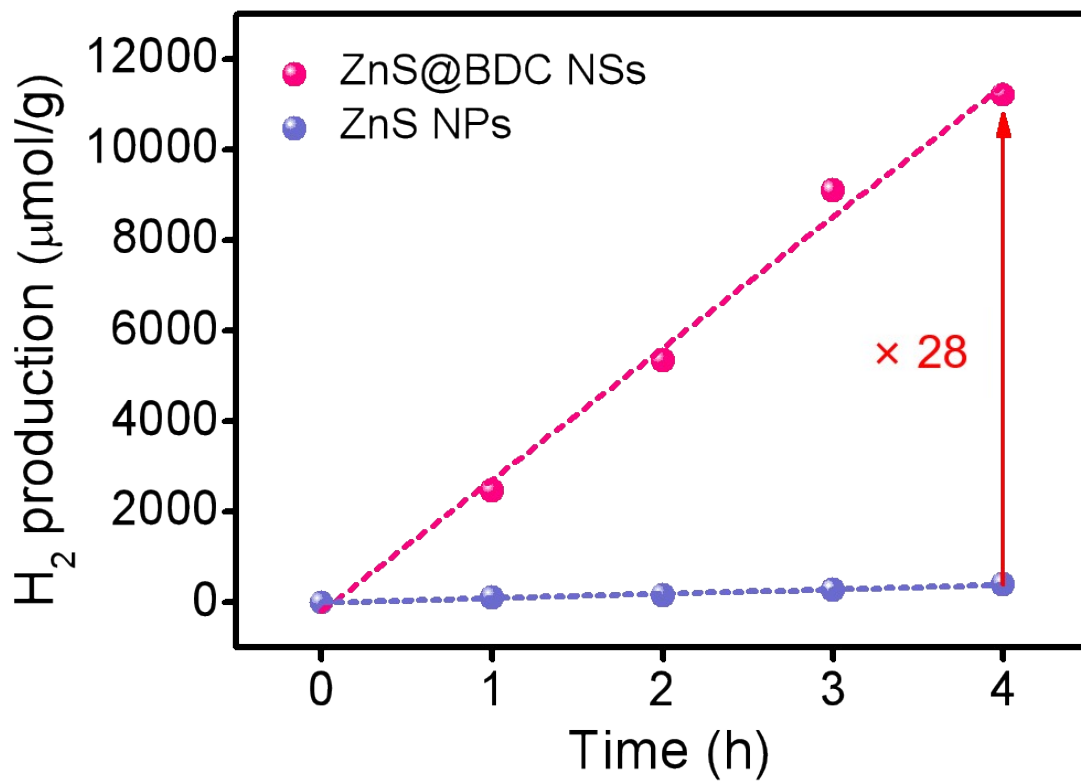

**Figure S9.** The photocatalytic activity for ZnS@BDC NSs and traditional ZnS NPs.

**Table S1.** Comparison of the H<sub>2</sub>-production rates of CdS-based photocatalysts for water splitting

| Photocatalyst                           | Light source                   | Sacrificial agent                                                                | Activity<br>$\mu\text{mol h}^{-1} \text{g}^{-1}$ | Recycled times | Ref |
|-----------------------------------------|--------------------------------|----------------------------------------------------------------------------------|--------------------------------------------------|----------------|-----|
| HP-CdS                                  | Visible light (> 380 nm)       | 0.1 M Na <sub>2</sub> S/Na <sub>2</sub> SO <sub>3</sub>                          | 634                                              | 16h            | 2   |
| c-CdS NC                                | LEDs lights (= 420 nm)         | 0.35 M Na <sub>2</sub> S and 0.25 M Na <sub>2</sub> SO <sub>3</sub>              | 7200                                             | 7.5h           | 3   |
| CdS nanosheet-assembled flowers         | Visible light (> 420 nm)       | 10 vol% lactic acid (0.5 wt% Pt)                                                 | 9374                                             | 15h            | 4   |
| g-C <sub>3</sub> N <sub>4</sub> /CdS    | Visible light ( $\geq$ 400 nm) | 20 vol% lactic acid (1.0 wt% Pt)                                                 | 13100                                            | 12h            | 5   |
| NiS/Zn <sub>x</sub> Cd <sub>1-x</sub> S | Visible light (> 420 nm)       | 0.35 M Na <sub>2</sub> S and 0.25 M Na <sub>2</sub> SO <sub>3</sub>              | 16780                                            | 20h            | 6   |
| CdS hexagonal plates                    | Visible light ( $\geq$ 420 nm) | 0.35 M Na <sub>2</sub> S and 0.25 M Na <sub>2</sub> SO <sub>3</sub> (0.5 wt% Pt) | 1782                                             | N.A.           | 7   |
| Graphene oxide/CdS                      | Visible light ( $\geq$ 420 nm) | 0.35 M Na <sub>2</sub> S and 0.25 M Na <sub>2</sub> SO <sub>3</sub>              | 3140                                             | 15h            | 8   |
| Ni <sub>2</sub> P@CdS                   | Visible light (> 420 nm)       | None                                                                             | 837.94                                           | 12h            | 9   |

|         |                             |                                                                           |       |     |              |
|---------|-----------------------------|---------------------------------------------------------------------------|-------|-----|--------------|
| CdS-Au  | Visible light<br>(> 420 nm) | 10 vol%<br>lactic acid<br>(0.5 wt% Pt)                                    | 6385  | 15h | 10           |
| C/CdS   | Visible light<br>(> 420 nm) | 0.35 M Na <sub>2</sub> S<br>and 0.25 M<br>Na <sub>2</sub> SO <sub>3</sub> | 5367  | 16h | 11           |
| CdS@BDC | Visible light<br>(> 380 nm) | 0.1 M<br>Na <sub>2</sub> S/Na <sub>2</sub> SO <sub>3</sub>                | 13081 | 16h | This<br>work |

---

**Table S2.** The quantum efficiency QE of CdS-based photocatalysts and the previously reported CdS-based photocatalysts

| <b>Photocatalysts</b>                                               | <b>Co-catalysts</b> | <b>Light sources</b> | <b>Sacrificial agents</b>                         | <b>QE (%)</b> | <b>References</b> |
|---------------------------------------------------------------------|---------------------|----------------------|---------------------------------------------------|---------------|-------------------|
| CdS                                                                 | -                   | 400 nm               | Na <sub>2</sub> S-Na <sub>2</sub> SO <sub>3</sub> | 3.2           | 12                |
| CdS                                                                 | F/G                 | 420 nm               | methanol                                          | 7.24          | 13                |
| CdS                                                                 | Ni <sub>2</sub> SP  | 420 nm               | Na <sub>2</sub> S-Na <sub>2</sub> SO <sub>3</sub> | 4.8           | 14                |
| CdS                                                                 | NiSe <sub>2</sub>   | 420nm                | Na <sub>2</sub> S-Na <sub>2</sub> SO <sub>3</sub> | 1.5           | 15                |
| CdS/Cu <sub>7</sub> S <sub>4</sub> /g-C <sub>3</sub> N <sub>4</sub> | -                   | 420 nm               | Na <sub>2</sub> S-Na <sub>2</sub> SO <sub>3</sub> | 4.4           | 16                |
| CdS/g-C <sub>3</sub> N <sub>4</sub>                                 | Pt                  | 420 nm               | lactic acid                                       | 2.79          | 17                |
| CdS NPs                                                             | -                   | 420 nm               | Na <sub>2</sub> S-Na <sub>2</sub> SO <sub>3</sub> | 0.23          | This work         |
| CdS QDs                                                             | -                   | 420 nm               | Na <sub>2</sub> S-Na <sub>2</sub> SO <sub>3</sub> | 1.37          | This work         |
| CdS@BDC NSs                                                         | -                   | 420 nm               | Na <sub>2</sub> S-Na <sub>2</sub> SO <sub>3</sub> | 4.61          | This work         |

**Table S3.** The average fluorescence lifetimes of CdS@BDC NSs and CdS NPs in pure H<sub>2</sub>O; [Catalysts] = 0.5 mg/mL.

| Samples     | Lifetime<br>$\tau$ (ns)                                   | Pre-exponential<br>factors B                  | Average<br>Lifetime,<br>$\langle \tau \rangle$ (ns) | $\chi^2$ |
|-------------|-----------------------------------------------------------|-----------------------------------------------|-----------------------------------------------------|----------|
| CdS@BDC NSs | $\tau_1 = 1.577$<br>$\tau_2 = 9.489$<br>$\tau_3 = 0.032$  | $B_1 = 2.86$<br>$B_2 = 4.50$<br>$B_3 = 92.64$ | 0.035                                               | 1.1664   |
| CdS NPs     | $\tau_1 = 2.330$<br>$\tau_2 = 0.019$<br>$\tau_3 = 11.204$ | $B_1 = 4.80$<br>$B_2 = 90.03$<br>$B_3 = 5.17$ | 0.021                                               | 1.2371   |

### Reference:

- 1 L. Ge, F. Zuo, J. K. Liu, Q. Ma, C. Wang, D. Z. Sun, L. Bartels, P. Y. Feng, *J. Phys. Chem. C*, 2012, **116**, 13708-13714.
- 2 J. D. Xiao, H. L. Jiang, *Small*, 2017, **13**, 1700632.
- 3 H. G. Yu, W. Zhong, X. Huang, P. Wang, J. G. Yu, *ACS Sustain. Chem. Eng.*, 2018, **6**, 5513-5523.
- 4 Q. J. Xiang, B. Cheng, J. G. Yu, *Appl. Catal. B*, 2013, **138**, 299-303.
- 5 J. He, L. Chen, Z. Q. Yi, D. Ding, C. T. Au, S. F. Yin, *Catal. Commun.*, 2017, **99**, 79-82.
- 6 X. X. Zhao, J. R. Feng, J. Liu, W. Shi, G. M. Yang, G. C. Wang, P. Cheng, *Angew. Chem. Int. Ed.*, 2018, **57**, 9790-9794.
- 7 D. Lang, F. Liu, G. H. Qiu, X. H. Feng, Q. J. Xiang, *ChemPlusChem*, 2014, **79**, 1726-1732.

- 8 T. Y. Peng, K. Li, P. Zeng, Q. G. Zhang, X. G. Zhang, *J. Phys. Chem. C*, 2012, **116**, 22720-22726.
- 9 W. L. Zhen, X. F. Ning, B. J. Yang, Y. Q. Wu, Z. Li, G. X. Lu, *Appl. Catal. B*, 2018, **221**, 243-257.
- 10 J. Xu, W. M. Yang, S. J. Huang, H. Yin, H. Zhang, P. Radjenovic, Z. L. Yang, Z. Q. Tian, J. F. Li, *Nano Energy*, 2018, **49**, 363-371.
- 11 Z. Q. Xiang, J. X. Nan, J. W. Deng, Y. Shi, Y. F. Zhao, B. Zhang, X. Xiang, *J. Alloys Compd.*, 2019, **770**, 886-895.
12. P. Zhang, D. Luan, X. W. Lou, *Adv. Mater.* 2020, 32, 2004561.
13. W. C. Wang, Y. Tao, J. C. Fan, Z. P. Yan, H. Shang, D. L. Phillips, M. Chen, G. S. Li, *Adv. Funct. Mater.* 2022, 32, 2201357
14. D. Ren, Z. Liang, Y. H. Ng, P. Zhang, Q. Xiang, X. Li, *Chem. Eng. J.* 2020, 390, 124496.
15. Z. Chen, H. Gong, Q. Liu, M. Song, C. Huang, *ACS Sustainable Chem. Eng.* 2019, 7, 16720-16728.
16. J. Chu, X. Han, Z. Yu, Y. Du, B. Song, P. Xu, *ACS Appl. Mater. Interfaces* 2018, 10, 20404.
- 17 J. Wu, W. Xia, M. H. Lan, X. J. Xing, J. C. Hu, L. Huang, J. Liu, Y. Y. Ren, H. F. Liu, F. Wang, *J. Mater. Chem. A*, 2020, 8, 21690
